# Supplementary material for: Nano-sized H-ZSM-5 zeolite catalyzes aldol condensation reaction to prepare methyl acrylate and acrylic acid
Source: Royal Society of Chemistry journal article supplement (doi:10.1039/d2cy00447j), 2022-01-01
Supplement: d2cy00447j1.pdf [file d2cy00447j1.pdf]

## Supplementary Information

### **Nano-sized H-ZSM-5 Zeolite Catalyzes Aldol Condensation**

#### **Reaction to Prepare Methyl Acrylate and Acrylic Acid**

Mingguan Xie <sup>a,b,c</sup>, Youming Ni <sup>a,b,\*</sup>, Xudong Fang <sup>a,b,c</sup>, Hongchao Liu <sup>a,b</sup>, Zhiyang Chen <sup>a,b</sup>, Xiangnong Ding <sup>a,b,c</sup>, Linying Wang <sup>a,b</sup> and Wenliang Zhu <sup>a,b,\*</sup>

<sup>a</sup> National Engineering Research Center of Lower-Carbon Catalysis Technology, Dalian Institute of Chemical Physics, Chinese Academy of Sciences, Dalian 116023, Liaoning, China

<sup>b</sup> Dalian National Laboratory for Clean Energy, Dalian 116023, Liaoning, China

<sup>c</sup> University of Chinese Academy of Sciences, Beijing 100049, China

\*Correspondence and requests for materials should be addressed to Wenliang Zhu ([wlzhu@dicp.ac.cn](mailto:wlzhu@dicp.ac.cn)) or Youming Ni ([niyouming@dicp.ac.cn](mailto:niyouming@dicp.ac.cn)).

---

# Table of Contents

**Figure.S1** Characterization of zeolites.

**Figure.S2** The programmed temperature in the stability test.

**Figure.S3** TGA analysis of the spent catalysts.

**Figure.S4** NH<sub>3</sub>-TPD for N-H-ZSM-5 zeolite catalysts.

**Figure.S5** Py-FTIR for N-H-ZSM-5 zeolite catalysts.

**Figure.S6** TEM image for N-H-ZSM-5 zeolite catalysts.

**Figure.S7** Initial uptake rate of MAc in catalyst measured by IGA.

**Figure. S8** Reaction pathways of MAc and tioxane in H-type zeolite.

**Figure S9** UV-Vis of the fresh and spent catalysts.

**Supplementary References:**

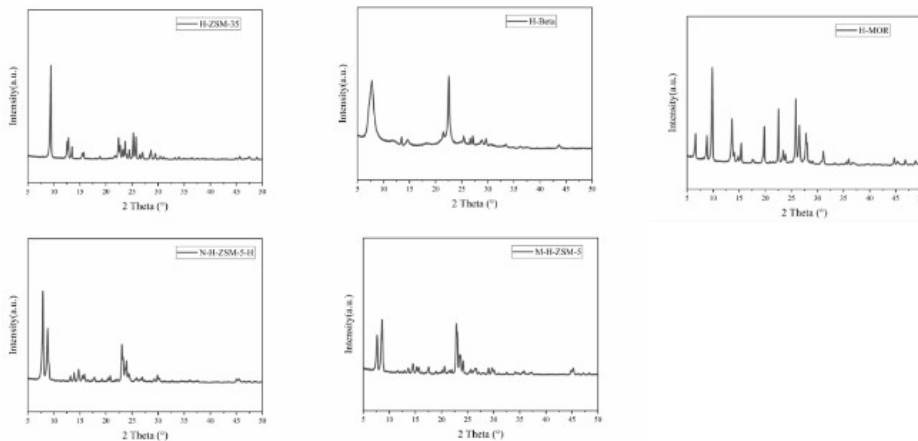

| Zeolites                                         | N-H-ZSM-5 | H-ZSM-35 | H-Beta | H-MOR | N-H-ZSM-5-H | M-H-ZSM-5 |
|--------------------------------------------------|-----------|----------|--------|-------|-------------|-----------|
| SiO <sub>2</sub> /Al <sub>2</sub> O <sub>3</sub> | 40.8      | 37.5     | 36.6   | 28.7  | 221.1       | 36.5      |

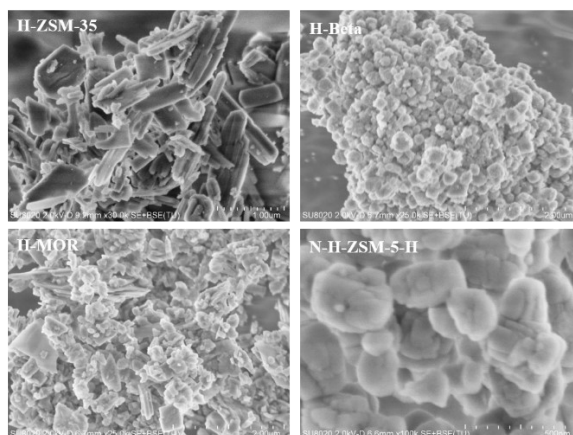

Figure. S1 XRD Characterization, XRF characterization and SEM of zeolites used in this study.

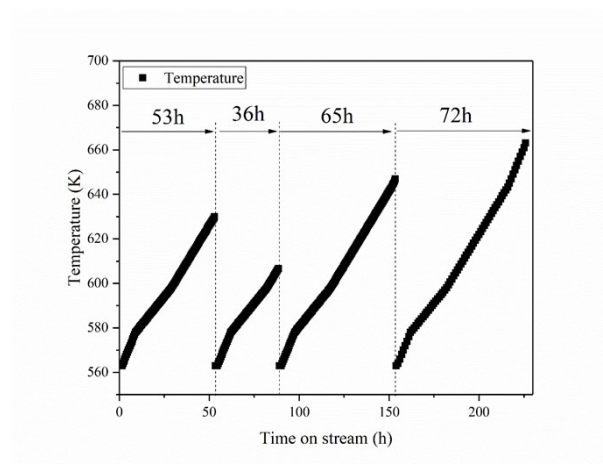

Figure. S2 The programmed temperature in the stability test for aldol condensation reaction over fresh and regenerated N-H-ZSM-5.

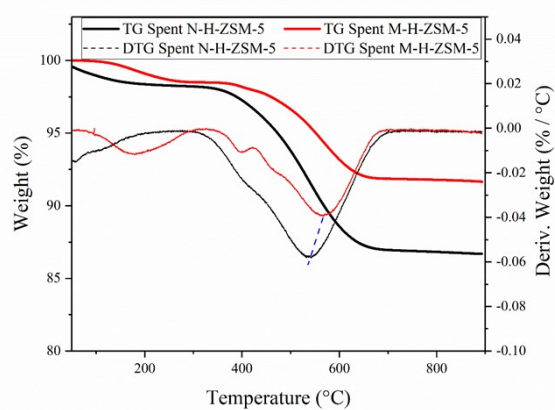

**Figure. S3 TGA analysis of the spent catalysts.**

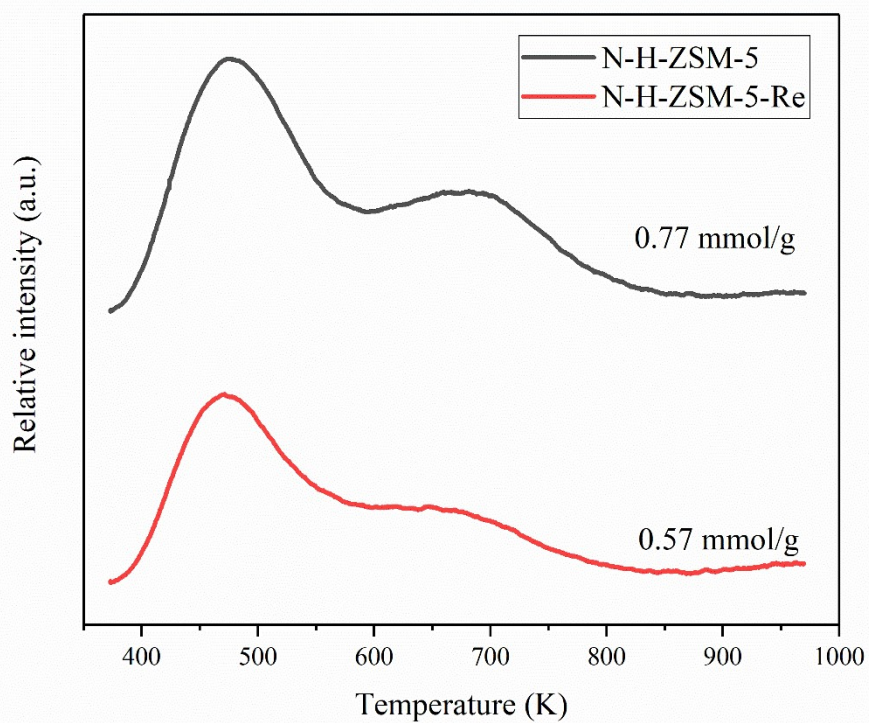

**Figure. S4 NH<sub>3</sub>-TPD for N-H-ZSM-5 zeolite catalysts.**

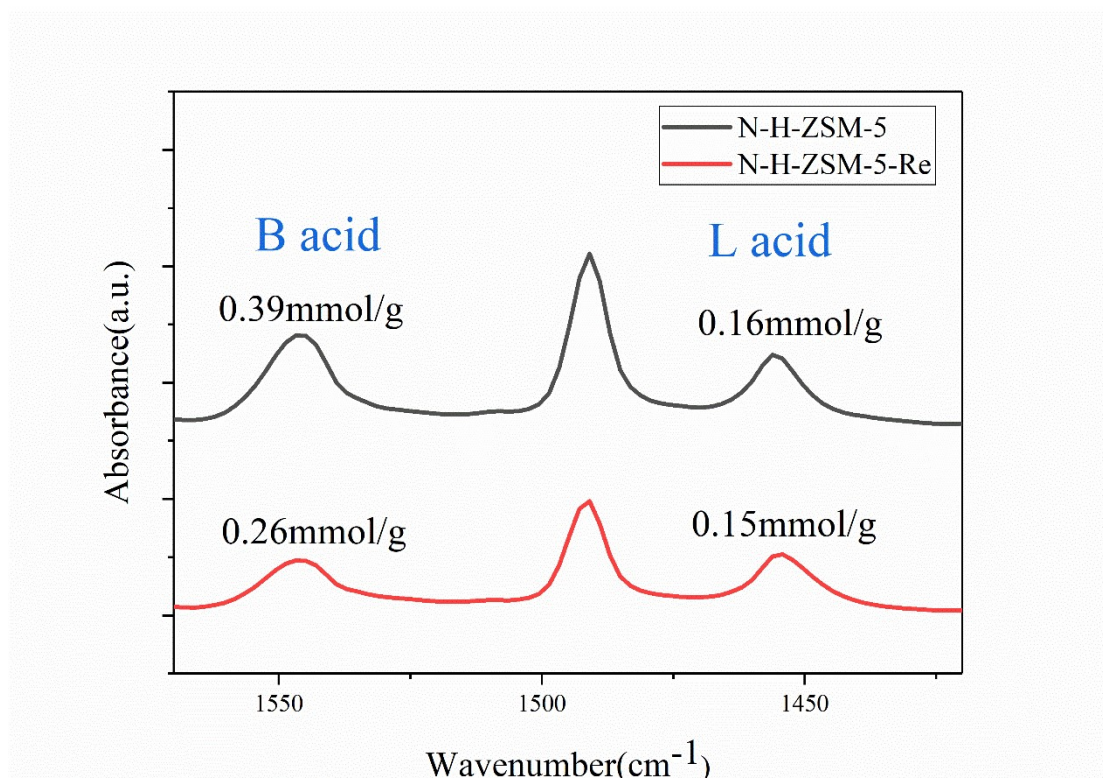

Figure. S5 Py-FTIR for N-H-ZSM-5 zeolite catalysts.

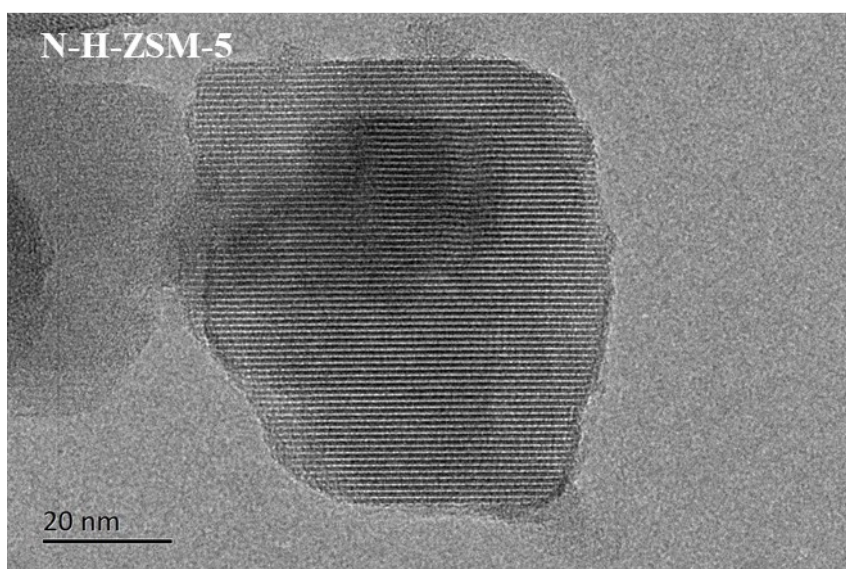



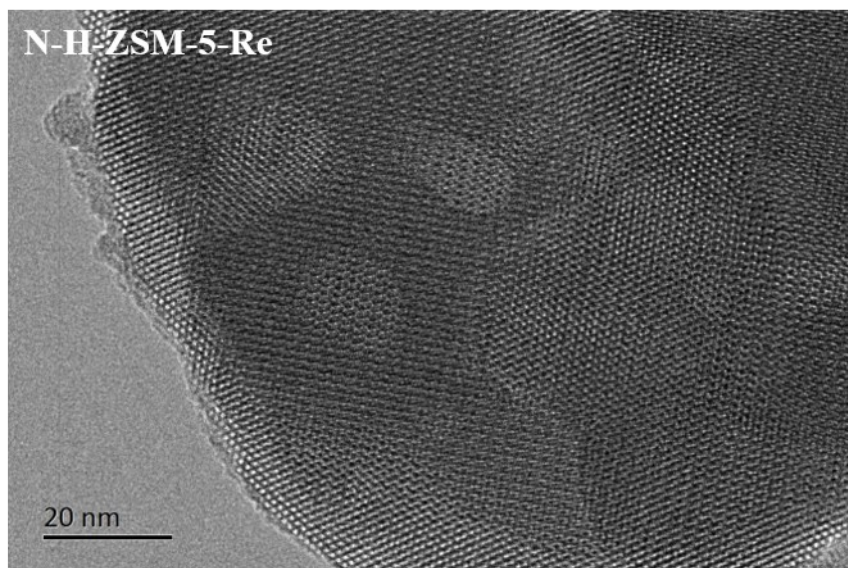

Figure. S6 TEM image for N-H-ZSM-5 zeolite catalysts.

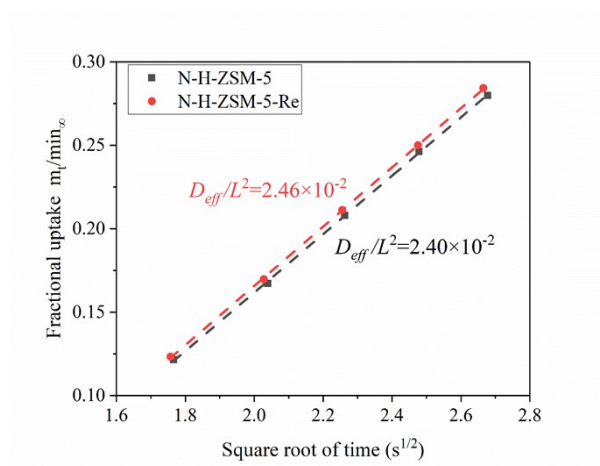

Figure. S7 Initial uptake rate of MAC in catalyst measured by IGA (313K, 5mbar).

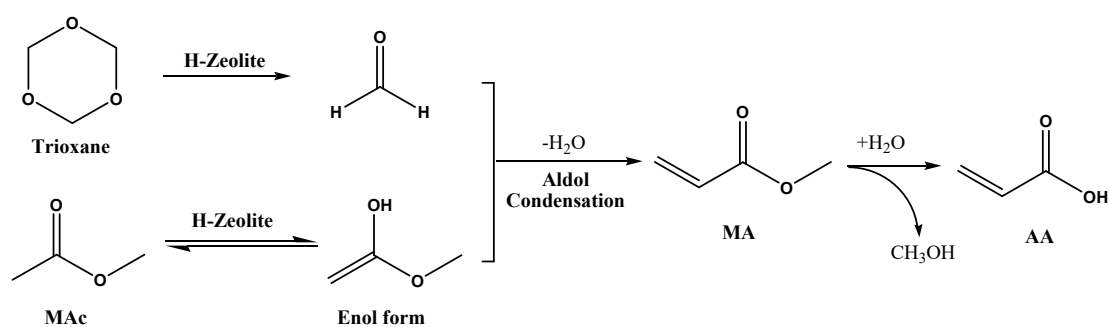

Figure. S8 Reaction pathways of MAC and trioxane in H-type zeolite.

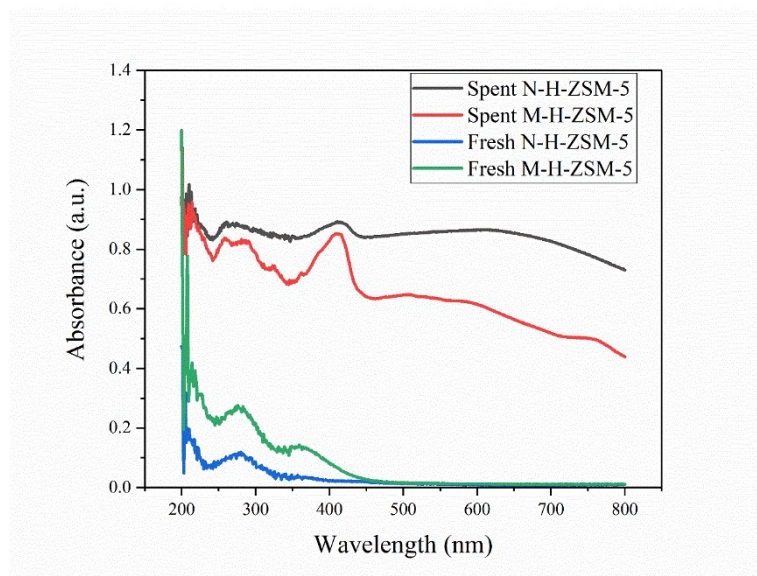

**Figure S9 UV-Vis of the fresh and spent catalysts.**

The fresh catalyst and the spent catalyst were analysed by UV-Vis. It is obvious that the fresh catalyst has no peaks above 450 nm. Compared with the spent M-H-ZSM-5, the spent N-H-ZSM-5 has a large broad peak at 620 nm, which is usually attributed to polyaromatic hydrocarbons<sup>1-2</sup>.

### **Supplementary References:**

1. V. Van Speybroeck, K. Hemelsoet, K. De Wispelaere, Q. Qian, J. Van der Mynsbrugge, B. De Sterck, B. M. Weckhuysen and M. Waroquier, *ChemCatChem*, 2013, **5**, 173-184.
2. E. Borodina, F. Meirer, I. Lezcano-Gonzalez, M. Mokhtar, A. M. Asiri, S. A. Al-Thabaiti, S. N. Basahel, J. Ruiz-Martinez and B. M. Weckhuysen, *ACS Catal.*, 2015, **5**, 992-1003.
